# Supplementary material for: The Clinical Utility of Two High-Throughput 16S rRNA Gene Sequencing Workflows for Taxonomic Assignment of Unidentifiable Bacterial Pathogens in Matrix-Assisted Laser Desorption Ionization–Time of Flight Mass Spectrometry
Source: PubMed Central journal article supplement (PMC8769742; doi:10.1128/jcm.01769-21), 2022-01-19
Supplement: jcm.01769-21-s0002.pdf [file jcm.01769-21-s0002.pdf]

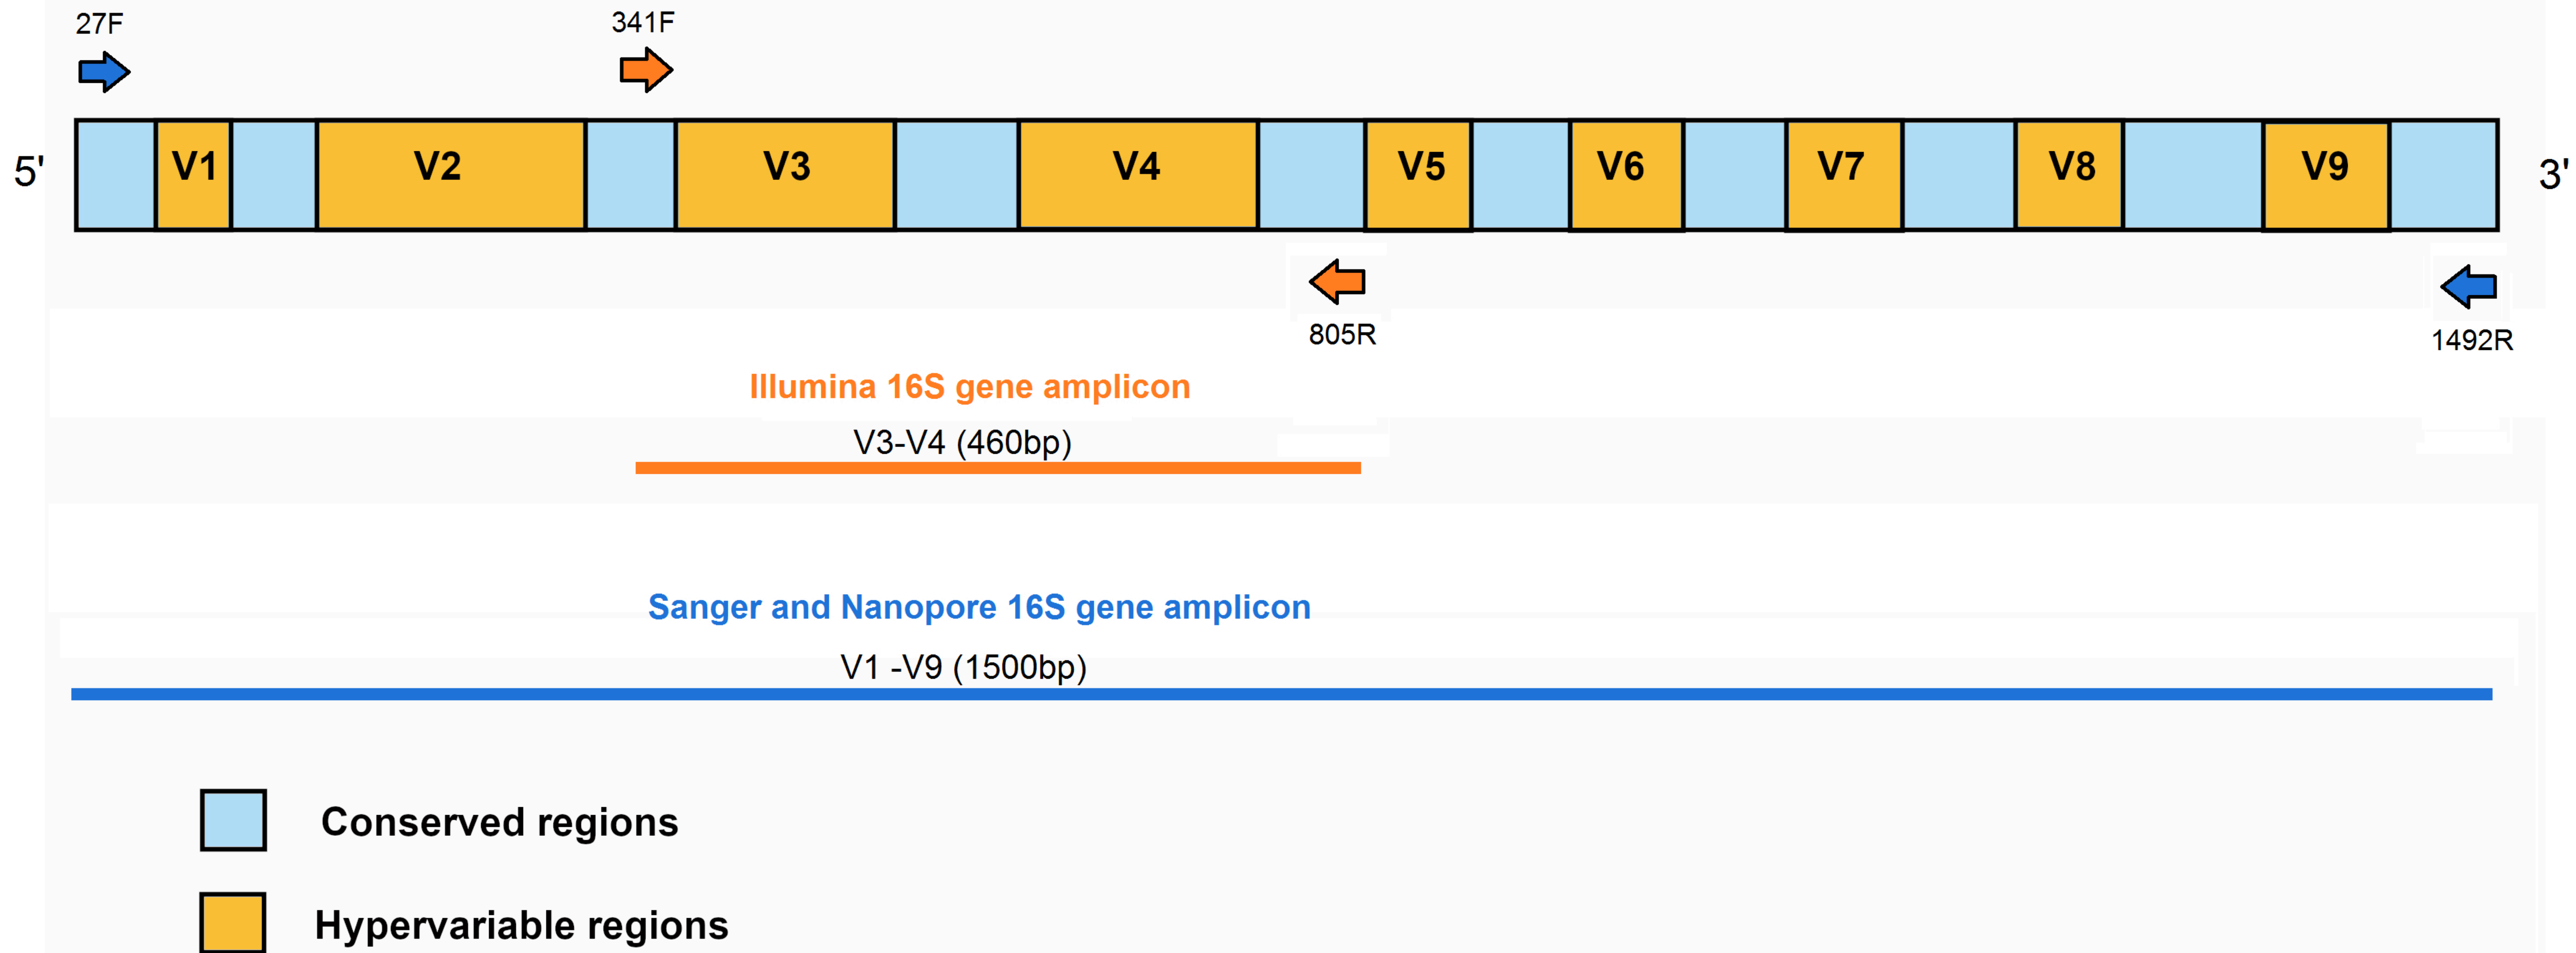

Supplementary figure 1. The 16S gene amplicon regions of Sanger, Illumina and Nanopore sequencing workflows.
